# Supplementary material for: Extraction, Isolation and Characterization of Mycosporine-like Amino Acids from Four Species of Red Macroalgae
Source: MDPI journal article supplement (doi:10.3390/md19110615), 2021-10-28

**Figure S1: HPLC spectrum**

The following is HPLC spectra of the fraction T<sub>1</sub> which isolated from MAAs extracts from *Bangia fusco-purpurea*

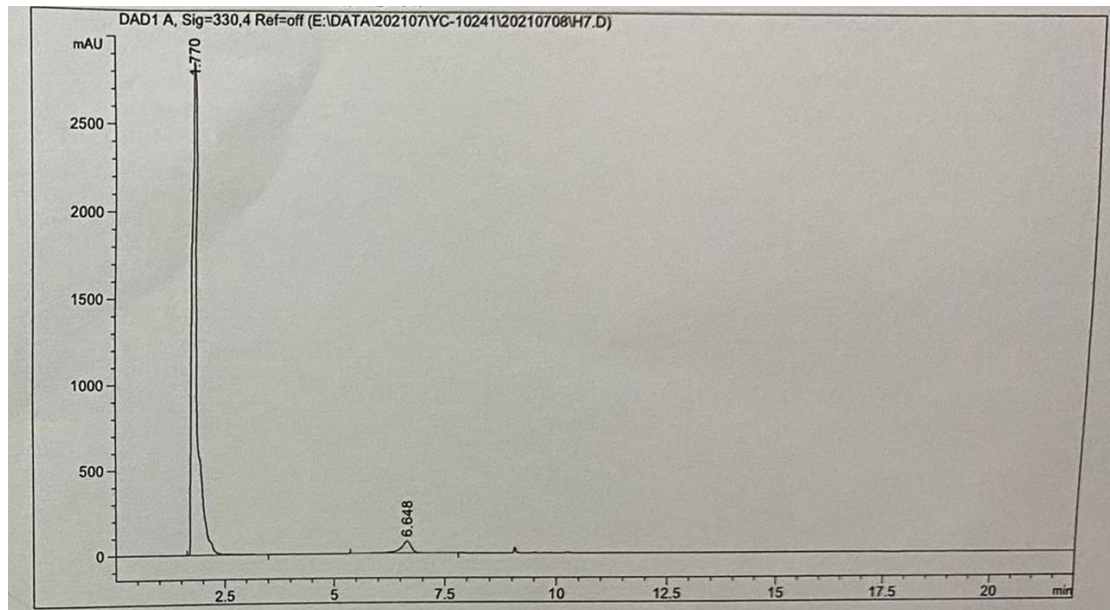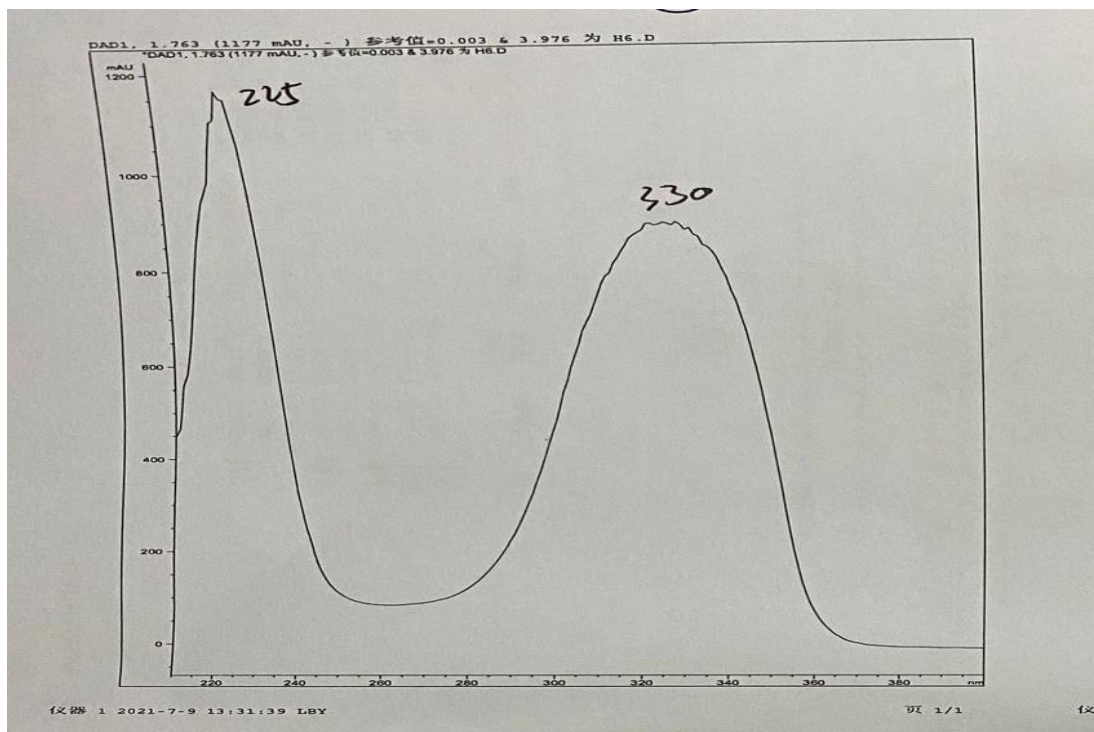

The following is HPLC spectra of the fraction J<sub>1</sub> which isolated from MAAs extracts from *Gracilaria* sp.

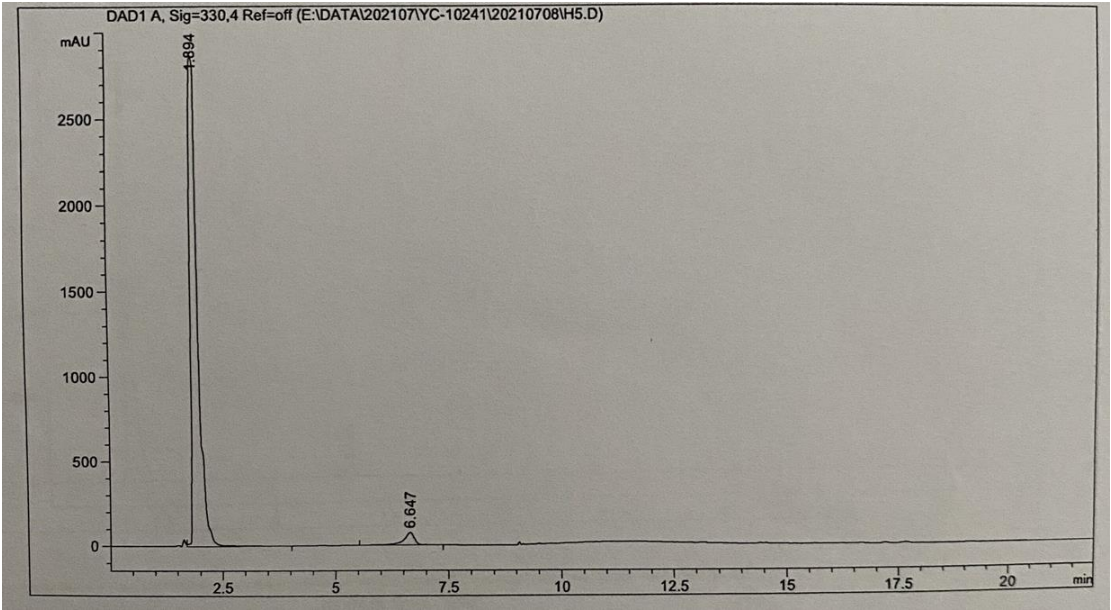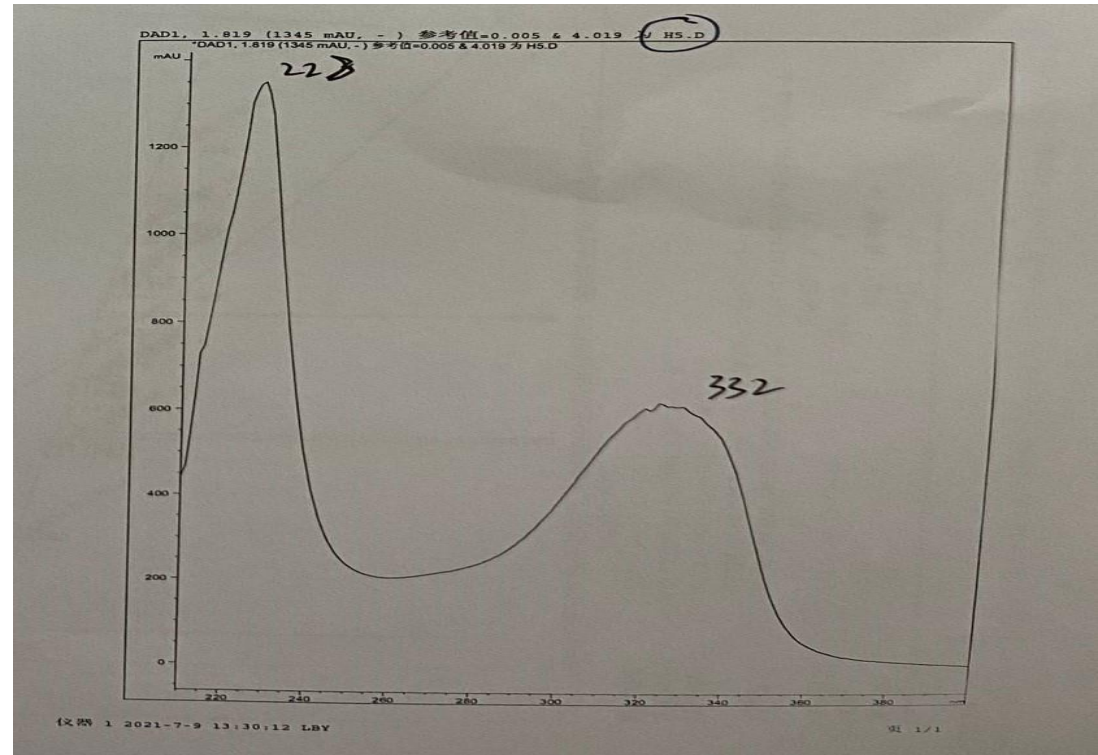

The following is HPLC spectra of the fraction J<sub>2</sub> which isolated from MAAs extracts from *Gracilaria* sp.

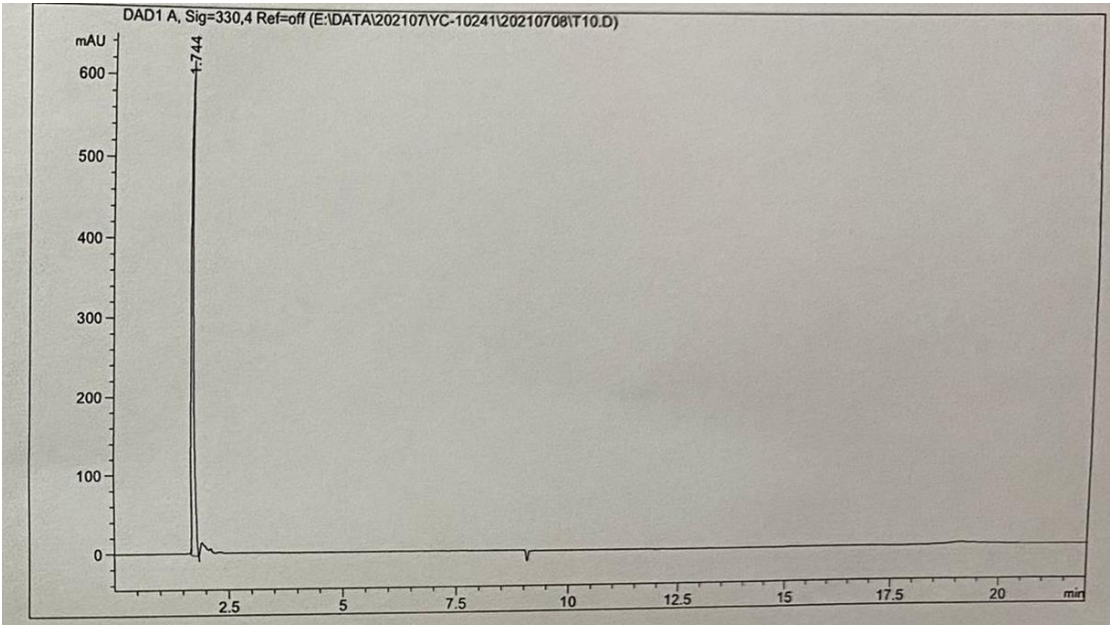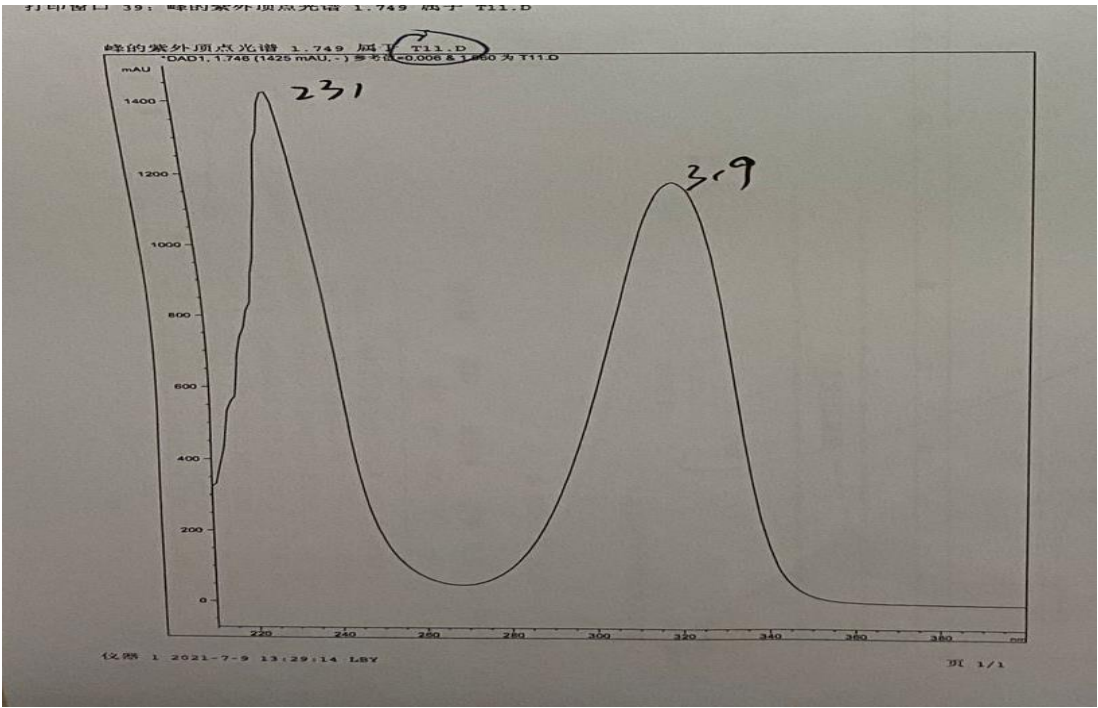

The following is HPLC spectra of MAAs extracts from *Gelidium amansii*

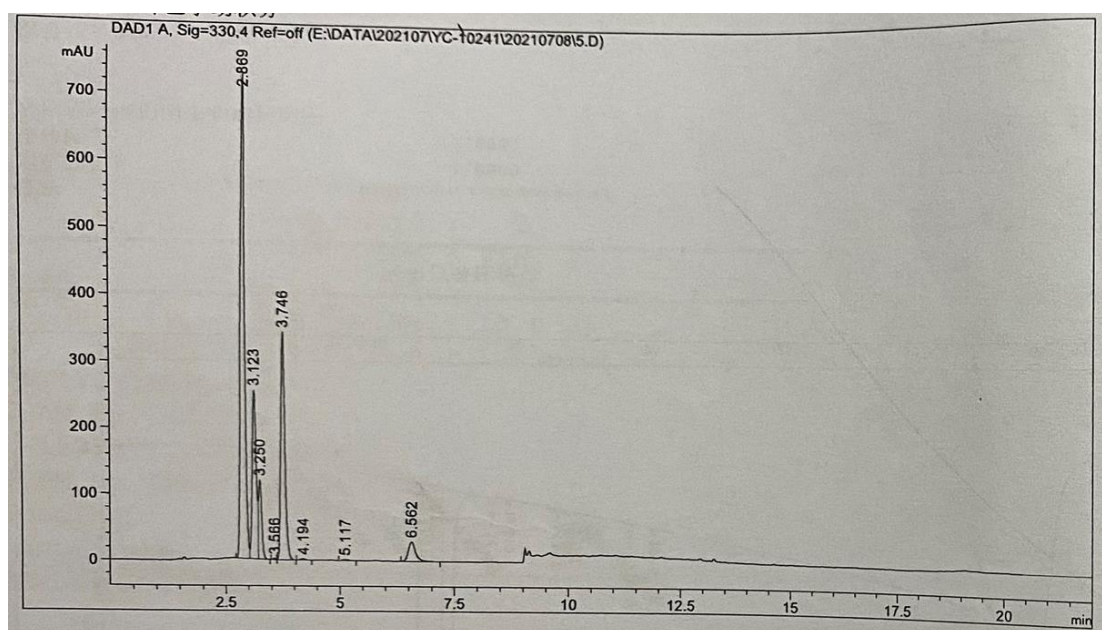



The following is HPLC spectra of MAAs extracts from *Gracilaria confervoides*

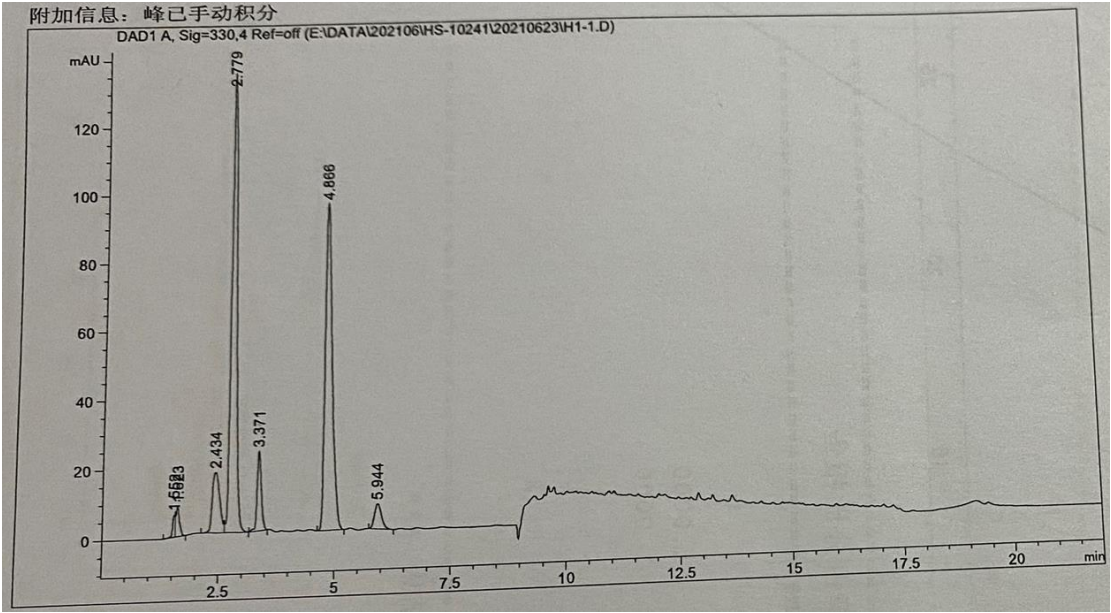

**Figure S2: ESI-MS spectrum**

The following is tandem mass spectra of one fraction (T<sub>1</sub>) which isolated from MAAs extracts from *Bangia fusco-purpurea*

F: + c ESI SRM ms2 333.100 [185.700-186.700, 229.320-230.320]

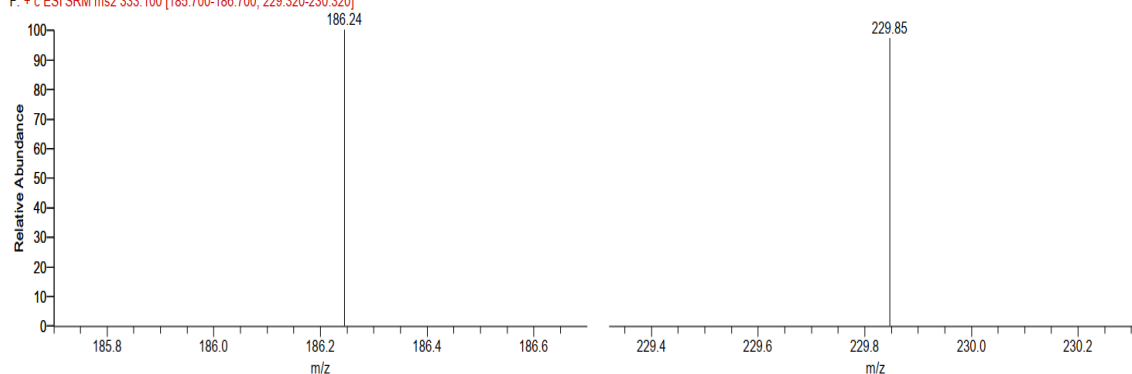

F: + c ESI SRM ms2 245.070 [136.500-137.500, 185.600-186.600]

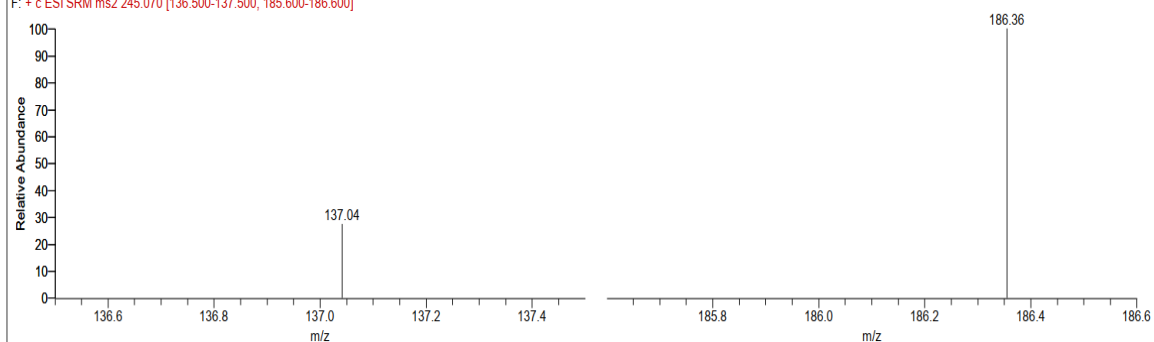

F: + c ESI SRM ms2 347.000 [185.530-186.530, 303.090-304.090]

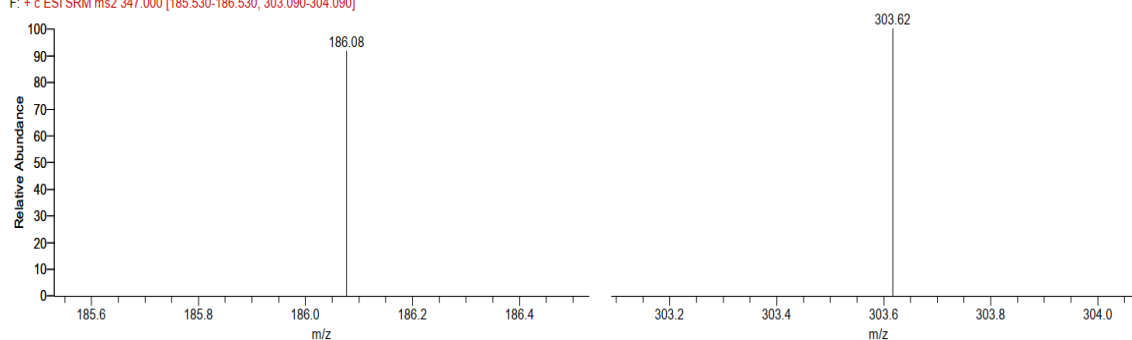

F: + c ESI SRM ms2 329.000 [145.270-146.270, 175.100-176.100]

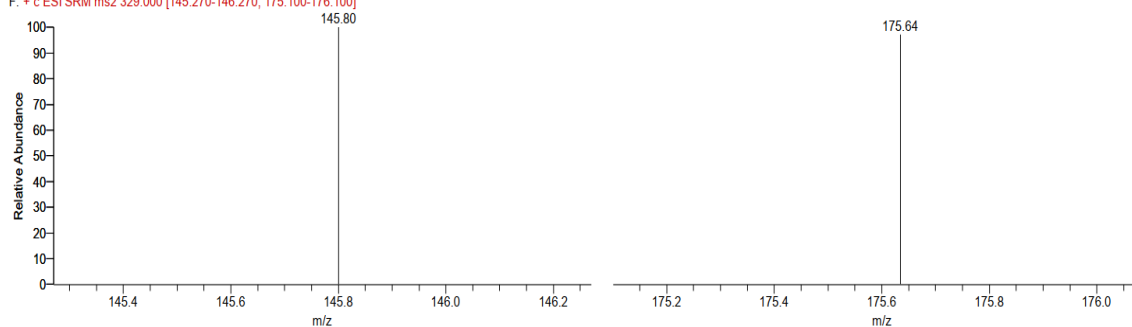

The following is the mass spectrum of two fractions (J<sub>1</sub> and J<sub>2</sub>) which isolated from MAAs extracts from *Gracilaria* sp.

J<sub>1</sub>

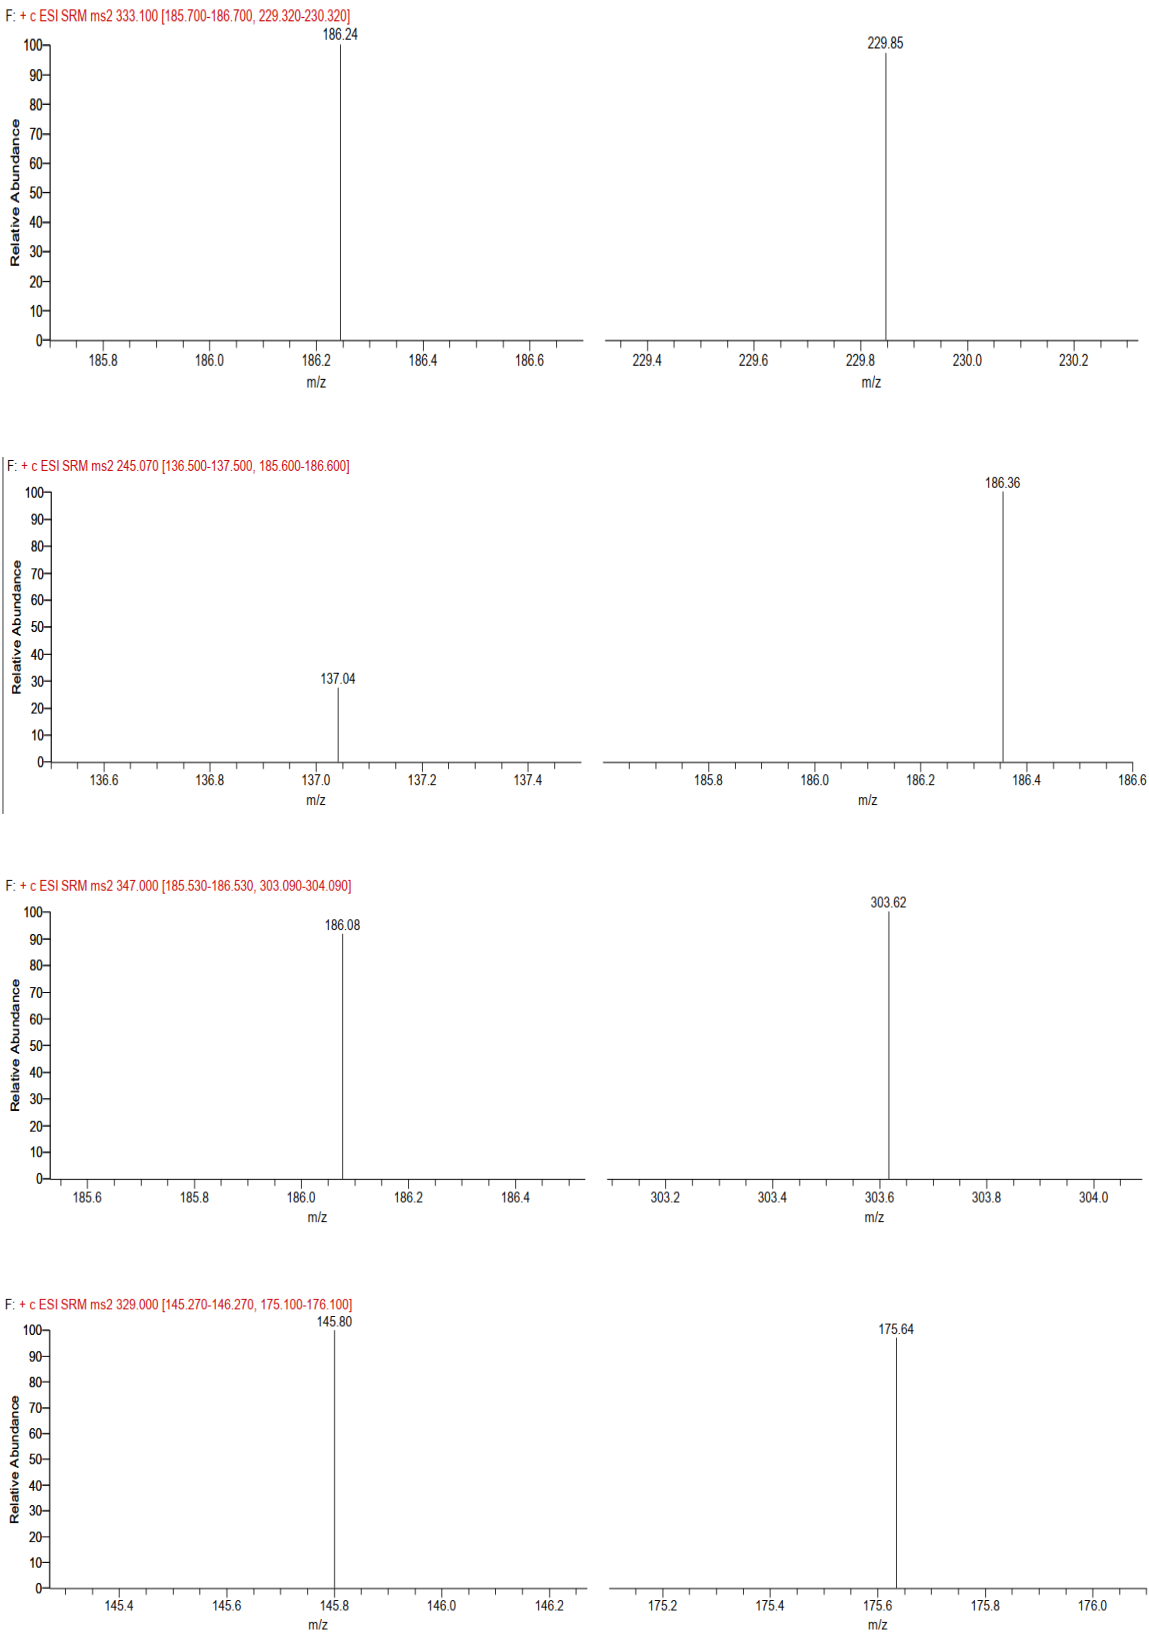

J<sub>2</sub>

F: + c ESI SRM ms2 245.070 [136.500-137.500, 185.600-186.600]

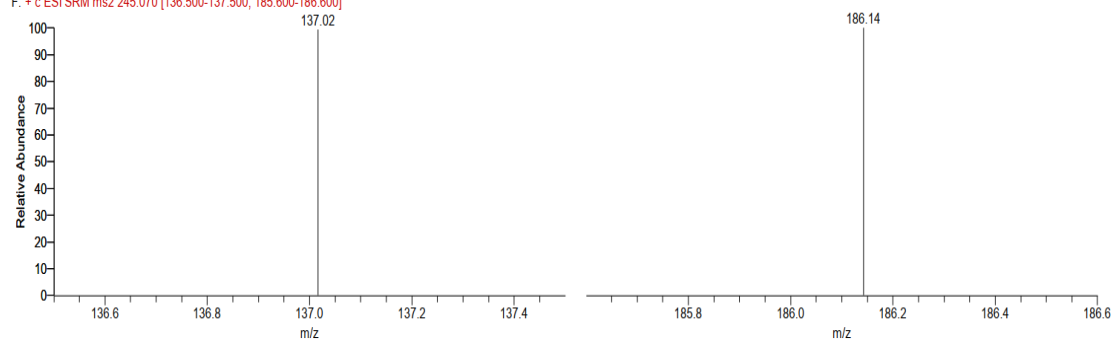

Supplement: s1 [file s1]
